# Supplementary material for: Complete Cycle Mapping Using a Quantitative At-Home Hormone Monitoring System in Prediction of Fertile Days, Confirmation of Ovulation, and Screening for Ovulation Issues Preventing Conception
Source: MDPI journal article supplement (doi:10.3390/medicina58121853), 2022-12-15
Supplement: s1 [file s1]

Complete cycle mapping using a quantitative at-home hormone monitoring system in prediction of fertile days, confirmation of ovulation, and screening for ovulation issues preventing conception

Andrea K. Wegrzynowicz<sup>1,2</sup>, Amy Beckley<sup>\*1</sup>, Aimee Eyvazzadeh<sup>3</sup>, Gary Levy<sup>4</sup>, John Park<sup>5</sup>, Joshua Klein<sup>6</sup>

## Supplemental Materials

### Table of Contents:

Figure S1: Proov Insight App algorithmically calculates hormone values

Figure S2: Quality control is based on best-fit line parameters

Table S1: Multihormone strips show no cross-reactivity to tested compounds

Table S2: Diagnoses and Treatments

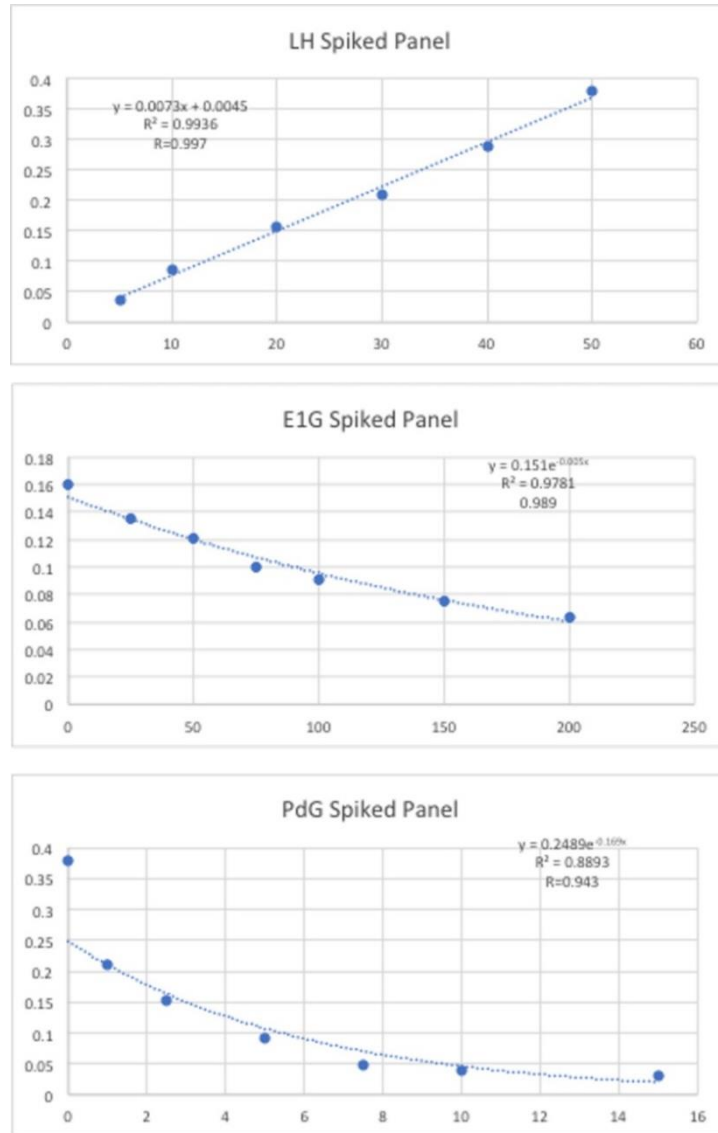

**Figure S1. Quality control is based on best-fit line parameters.** To ensure reproducibility of test strips, test panels for each hormone were run with sample strips from multiple lots. Sample panels and results are shown here for each hormone. Best-fit lines were created for each set of results, and reproducibility standards were met if thresholds for minimum R-values were met for 90% of strips. .

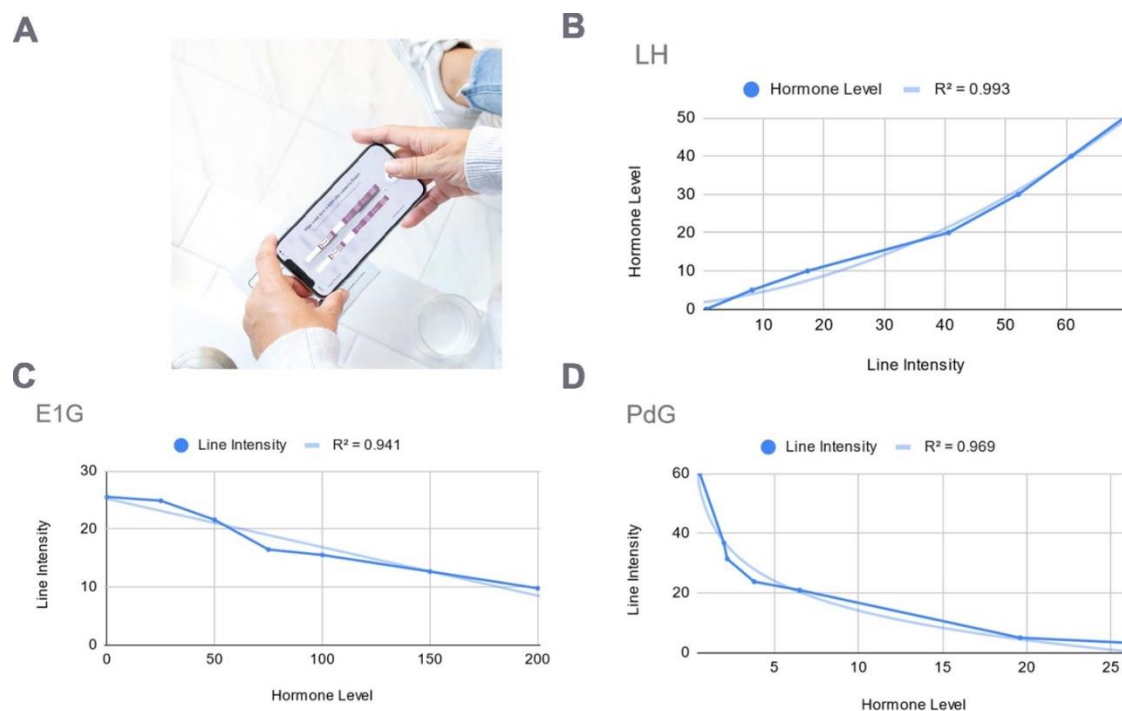

**Figure S2. Proov Insight App algorithmically calculates hormone values.** A) Users photograph multihormone and FSH test strips with their smartphone, guided by the Proov Insight App. The Proov Insight app uses an algorithm to calculate the hormone level based on the intensity of the line corresponding to that hormone, according to the following fits: B) 2<sup>nd</sup>-Degree Polynomial, LH C) Linear (inverse), E1G D) Logarithmic, PdG .

**Table S1.** Multihormone strips show no cross-reactivity to tested compounds.

| Substance            | Concentration | Substance        | Concentration |
|----------------------|---------------|------------------|---------------|
| LH                   | 600 mIU/ml    | Hemoglobin       | 500 mg/dl     |
| HCG                  | 1000 mIU/ml   | Tetracycline     | 20 mg/dl      |
| Progesterone         | 100 ng/ml     | Nitrite Positive | 1%            |
| PdG                  | 60 ug/ml      | Phenothiazine    | 20 mg/dl      |
| Estone-3-Glucuronide | 600 ng/ml     | Ethanol          | 1%            |
| Acetaminophen        | 20 mg/dl      | Albumin          | 100 mg/dl     |
| Ascorbic Acid        | 20 mg/dl      | FSH              | 150 mIU/ml    |
| Caffeine             | 20 mg/dl      | pH 4             | NA            |
| Glucose              | 2000 mg/dl    | pH 5             | NA            |
| Ampicillin           | 20 mg/dl      | pH 8             | NA            |
| Ketone               | 1%            | pH 9             | NA            |
| Acetylsalicylic Acid | 20 mg/dl      | Specific Gravity | 1.00          |
| Atropine             | 20 mg/dl      | Specific Gravity | 1.015         |
| Gentisic Acid        | 20 mg/dl      | Specific Gravity | 1.025         |

**Table S2.** Diagnoses and Treatments.

| <b>Diagnosis</b>           | <b>Number of Women in Study</b> |
|----------------------------|---------------------------------|
| PCOS                       | 3                               |
| Diminished Ovarian Reserve | 4                               |
| Recurrent Pregnancy Loss   | 3                               |
| Endometriosis              | 1                               |
| Asherman Syndrome          | 1                               |
| <b>Treatment Used</b>      |                                 |
| Letrozole                  | 6                               |
| Clomid                     | 3                               |
| Progesterone               | 9                               |
| hCG Trigger                | 2                               |
